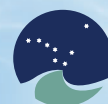

## Original Article

# From DNA to biomass: opportunities and challenges in species quantification of bulk fisheries products

Brian Klitgaard Hansen <sup>1\*</sup>, Gregory Kevin Farrant<sup>2</sup>, Rob Ogden<sup>3,4</sup>, Emily Humble<sup>4</sup>, Guðbjörg Ólafsdóttir<sup>2</sup>, Dorte Bekkevold <sup>1</sup>, Steen Wilhelm Knudsen<sup>5,6</sup>, Peter Rask Møller<sup>5</sup>, and Einar Eg Nielsen<sup>1</sup>

<sup>1</sup>Section for Marine Living Resources, National Institute of Aquatic Resources, Technical University of Denmark, Vejløvej 39, 8600 Silkeborg, Denmark

<sup>2</sup>Matis ltd, Vínlandsleið 12, 113 Reykjavík, Iceland

<sup>3</sup>TRACE Wildlife Forensics Network, 16 Corstorphine Hill Avenue, Edinburgh EH12 6LE, UK

<sup>4</sup>Royal (Dick) School of Veterinary Studies and the Roslin Institute, University of Edinburgh, Easter Bush Campus, Edinburgh EH25 9RG, UK

<sup>5</sup>Natural History Museum of Denmark, University of Copenhagen, Universitetsparken 15, 2100 Copenhagen Ø, Denmark

<sup>6</sup>NIVA Denmark Water Research, Njalsgade 76, 2300 Copenhagen S, Denmark

\*Corresponding author: tel: +45 35 88 31 00; fax: +45 35883150; e-mail: [bkha@aqu.dtu.dk](mailto:bkha@aqu.dtu.dk).

Hansen, B. K., Farrant, G. K., Ogden, R., Humble, E., Ólafsdóttir, G., Bekkevold, D., Knudsen, S. W., Møller, P. R., and Nielsen, E. E. From DNA to biomass: opportunities and challenges in species quantification of bulk fisheries products. – ICES Journal of Marine Science, 77: 2557–2566.

Received 10 April 2020; revised 11 June 2020; accepted 12 June 2020; advance access publication 18 August 2020.

Fisheries enforcement relies on visual catch identification and quantification at sea or when landed. Silage (fish dissolved in acid) and fish blocks (block frozen fish) are promising methods for on-board processing and storage of low-value catches. We examined the use of non-destructive sampling and two DNA-based methods, quantitative PCR (qPCR) and metabarcoding, to assess species composition and relative abundance in industrial grade experimental silage and fish blocks. We demonstrate the ability to identify and quantify DNA from fish species in both products. qPCR analysis of small silage samples collected over 21 days detected all target control species. DNA from one species (Atlantic wolffish) was consistently overrepresented while, for three species of gadoids (Atlantic cod, haddock and whiting), the DNA content matched input tissue proportions with high accuracy. qPCR and metabarcoding of fish blocks, sampled as run-off water and exterior swabs, provided consistent species detection, with the highest variance observed in quantification from swab samples. Our analysis shows that DNA-based methods have significant potential as a tool for species identification and quantification of complex on-board-processed seafood products and are readily applicable to taxonomically and morphologically similar fish. There is, however, a need for establishing DNA/weight calibration factors for primary fisheries species.

**Keywords:** DNA quantification, metabarcoding, MinION, multi-species fisheries products, quantitative PCR

## Introduction

Historically, discards of fish have represented a considerable fraction of the total catch in many fisheries (Heath *et al.*, 2014; Guillen *et al.*, 2018). Discarding generally occurs when fish are undersized, represent no commercial value, or are outside

existing quotas (Guillen *et al.*, 2018). However, discarding is widely regarded as a waste of resources and has many undesirable ecological and socio-economical side effects (Heath *et al.*, 2014; Guillen *et al.*, 2018). As a result, many countries are implementing regulations to land all catches, including the most recent

European Landing Obligation under the Common Fisheries Policy (European Commission, 2013). However, on-board handling, sorting, and storing of low-value specimens are not economically attractive for fisheries (Batsleer et al., 2015). Hence, alternatives minimizing handling and storage of unwanted catches have been suggested, including development of bulk products such as silage and block frozen fish (Larsen et al., 2013). On-board silage production entails dissolving fish in strong acid. The silage process conserves the raw material for further processing and importantly saves valuable space for the storage of high-value fish. Another bulk handling and storage option is to pack and freeze low-value species on board into so-called “fish blocks” (Larsen et al., 2013). However, on-board production of silage and fish blocks makes Monitoring Control and Surveillance (MCS) by fisheries inspectors virtually impossible, as it effectively prohibits crosscheck reporting in the mandatory landing manifest with the content of the landed bulk product. Therefore, such mixed products cannot currently be landed in the EU due to the principle of control throughout the supply chain—from catch of fish to fishery products in the European Union (Reg. EC 1005/2008). Hence, finding reliable and cost-efficient alternatives to visual identification for assessing contents of these complex fish products could potentially benefit both the MCS practitioners and commercial fisheries by allowing the landing of analytically certified bulk products.

Over the last decade, genetic methods for species identification have undergone extensive development, from being restricted to identifying a single species from specimen-based samples, to the present state of the art allowing both qualitative and quantitative information to be derived from complex multi-species samples (e.g. Floren et al., 2015; Thomas et al., 2016; Ushio et al., 2018). Quantifying input biomass from DNA analysed in fish products is an emerging area of research and has a large unexplored potential in comparison to traditional visual identification, especially in samples where the morphological characteristics are sparse or absent (Nagase et al., 2010; Bojolly et al., 2017; Sánchez et al., 2019). Furthermore, DNA, particularly mitochondrial DNA (mtDNA), has been found suitable for species detection and quantification even when products are highly processed (e.g. Nagase et al., 2010; Wen et al., 2015; Piskata et al., 2017). Quantitative PCR (qPCR) is the gold standard for DNA quantification and has been utilized in the food fraud detection of raw and processed meat for over a decade (e.g. Lopez and Pardo, 2005; Tanabe et al., 2007). More recent metabarcoding approaches using high-throughput sequencing (HTS) can also potentially be used to quantify target DNA but have not yet been developed to the same extent. One advantage of metabarcoding is that it can provide information on the entire DNA biodiversity within a sample, without *a priori* knowledge of which species to assess, as required for qPCR (Miya et al., 2015; Menegon et al., 2017; Stat et al., 2017; Srivathsan et al., 2018). One particularly promising device for metabarcoding is the miniaturized nanopore-based DNA sequencing platform, the MinION (Oxford Nanopore Technologies, UK), which offers several advantages over traditional HTS technologies, including portability, low initial start-up costs, and real-time analysis (Mikheyev and Tin, 2014).

Our aim was to test, as proof of concept, DNA-based identification and quantification of mixed-fish species products using silage and fish blocks as examples, which are high on the agenda regarding practical use in fisheries under the European landing

obligation. We focused our analyses on three gadoids, Atlantic cod (*Gadus morhua*—hereafter cod), whiting (*Merlangius merlangus*), and haddock (*Melanogrammus aeglefinus*), as they represent important fisheries species subject to quotas and also often unintentionally are caught as bycatch, which historically has led to discard (Heath et al., 2014). In addition, we included Atlantic wolffish (*Anarhichas lupus*—hereafter wolffish), which represents a taxonomically different and less abundant species, that due to its demersal lifestyle often is caught as bycatch in gadoid fisheries (Grant and Hiscock, 2014). Using experimental mixes of tissue from individuals of these four species, we calculated and compared relative estimates of DNA abundance and input tissue quantity using both qPCR and MinION metabarcoding. Our focus was on experimentally mixed silage and fish block samples, but we developed and tested a series of control samples of known species mixtures using normalized tissue and DNA, to understand variation in the relationships between levels of input tissue, DNA, and resulting species measurements. While the long-term goal of the approach is to apply it on fish catches found in the wild, we here provide the initial steps demonstrating the performance in a controlled experiment to be able to evaluate the precision and accuracy of the method.

## Material and methods

### Tissue and DNA-normalized samples

Estimation of tissue proportions from DNA copies (qPCR), or reads (MinION), commonly build on the assumption that there is a linear relationship between proportions of DNA and tissue, and thus that there is little or no variation in copies/reads per weight unit tissue. To assess intraspecific and interspecific variation in DNA/tissue ratios, we compared results based on a standardized starting tissue weight and a standardized starting DNA concentration. This was achieved by estimating: (i) the DNA concentration extracted per milligram of fin tissue ( $\text{ng}_{\text{DNA}}/\text{mg}_{\text{tissue}}$ ), (ii) the number of amplified target species mtDNA copies per milligram of starting tissue ( $\text{copies}_{\text{mtDNA}}/\text{mg}_{\text{tissue}}$ ), and (iii) the number of amplified target species mtDNA copies per nanogram of extracted DNA ( $\text{copies}_{\text{mtDNA}}/\text{ng}_{\text{DNA}}$ ). To test this, three whole individuals of each species were purchased on order at a local fish store, to minimize the time from catch to analysis, and fin tissue was collected using sterile forceps and scalpels. Tissue were stored at room temperature in sterile tubes filled with 96% EtOH until sample preparation. Single- and mixed-species samples for both tissue and DNA-normalized samples were prepared with different proportions of species (see Supplementary Table S1). Tissue samples were weighed on a Mettler AT460 (Mettler-Toledo, Slovenia) using a maximum of 30 mg of tissue/sample to minimize the risk of saturating extraction yield. Forceps and scalpels were changed between each individual for both collection and preparation of tissue samples. DNA extractions were conducted using the Omega Biotek E.Z.N.A. Tissue DNA kit (Omega Biotek, USA) applying the Tissue DNA protocol. Final elution was done with 200  $\mu\text{l}$  of elution buffer. DNA concentration was measured using a Qubit 3.0 fluorometer (dsDNA BR Assay Kit, Thermo Fisher Scientific, USA). DNA-normalized samples were made with DNA extracted from single-species samples and were normalized using nuclease-free water to 10  $\text{ng}/\mu\text{l}$ . After dilution, the samples were measured again to verify that the final concentration was  $\sim 10 \text{ ng}/\mu\text{l}$ . Tissue and DNA-normalized samples are hereafter referred to as control samples.

### Silage samples

The study utilized a common silage acid solution used in the industry consisting of 1.5% formic acid, 0.1% potassium sorbate, and 200 ppm ethoxyquin. pH was adjusted with sodium hydroxide to reach a target pH of 3.5. In total, 6.9 kg of whole gutted fish representing all four species, i.e. cod, whiting, haddock, and wolffish, were added to the silage solution on day 0. The silage was kept at room temperature during the entire experiment. Silage samples of 250 µl were collected at days 1, 2, 3, 4, 5, 7, 8, 9, 14, and 21 from the centre of the silage container, roughly 1 cm below the surface. Before sampling (except for day 1), the silage was stirred to homogenize and improve the decomposition of the fish. DNA extraction followed the standard Omega Biotek E.Z.N.A. tissue DNA kit protocol, with 1 h incubation and final elution in 200 µl elution buffer. Extracted DNA was measured on a Qubit and with a Bioanalyzer (Agilent Technologies, USA) using the High Sensitivity DNA assay. All samples were analysed with qPCR, while samples from day 2 and day 21 were analysed with MinION. Two laboratories conducted parallel MinION sample analysis (termed MinION-1 and MinION-2).

### Fish block samples

A fish block was prepared from fresh cod (83%) and wolffish (17%). The fish were weighed, put into a box, and frozen at  $-24^{\circ}\text{C}$ , identical to standard fish block operating procedures. Before sampling, collection tools were cleaned with a 0.5% bleach solution and rinsed with nuclease-free water. Two approaches for fish block content assessment were tested, referred to as “swab” (SW) and “run-off water” (RO). Three swab samples (SW1–3) were collected from fish block surfaces using a sterile cotton swab (806-WC, Puritan, USA) swiped across the surface of the fish block. For each sample, we altered the sampling pattern, i.e. front (SW1), back (SW2), and edges of the fish block (SW3). DNA was extracted from the swabs using the QIAamp DNA Mini Kit (QIAGEN, Germany). All swab sample replicates were analysed using qPCR and the MinION-2, while PCR products, using a universal primer set (see MinION and bioinformatics), for all three samples were pooled for the MinION-1 analysis. For the RO method, the same 8 l of demineralized water was poured over the fish block three times and subsequently collected in a tray. Next, triplicate 200–300 ml RO water samples (RO1–3) were subsampled and filtered using a sterile 60-ml syringe and a 0.22-µm Sterivex filter (SVGPL10RC, Merck, USA). Clogging of the Sterivex filters determined the exact sampling volume. DNA was extracted with a modified protocol of QIAGEN’s blood and tissue kit (QIAGEN, Germany) following Spens *et al.* (2017). The protocol was modified to include a 2-h incubation period at  $56^{\circ}\text{C}$  and with final elution carried out in 200 µl AE buffer. DNA concentration was assessed using Qubit. All three RO samples were analysed with both qPCR and MinION-2 metabarcoding, while only RO1 was analysed on MinION-1.

### Quantitative PCR

We used species-selective assays targeting regions of the mtDNA in cod, whiting, haddock, and wolffish (Gm, Mm, Ma, and Al, respectively). The Mm, Ma, and Al assays were developed by aligning sequences of the mtDNA cytochrome *b* or NADH dehydrogenase subunit 4-1 (ND1) genes and identifying gene regions with maximum interspecific sequence difference between target and non-target species. The Gm assay was developed by

Knudsen *et al.* (2019). As DNA is susceptible to degradation in processed samples (Piskata *et al.*, 2017), we developed assays for amplifying short PCR products (70–150 bp). Sequences were obtained from the National Center for Biotechnology Information (NCBI) Genbank database (<https://www.ncbi.nlm.nih.gov/genbank/>) using an integrated search tool in Geneious 9.1.6., and candidate primers and probes were found using the built-in Primer3 2.3.4 search engine (Kearse *et al.*, 2012). Distance matrices of nucleotide differences between target and non-target species were developed for primers and probes (Supplementary Table S2). Finally, the assays were tested *in silico* using Genbank’s online BLAST function, Primer-BLAST, and Nucleotide BLAST to assess the global specificity of primers and probes. Assays were tested and evaluated *in vitro* using the control samples.

Before qPCR analysis, control and RO samples were diluted (1:10, 1:80, or 1:100) with nuclease-free water to avoid PCR inhibition. qPCRs were conducted in 10 µl volumes with 4 µl TaqMan Universal PCR Master Mix (Thermo Fisher Scientific) and 1 µl template DNA. The final PCR volume was 10 µl, with various volumes of primers, probes, and nuclease-free water for each assay to obtain optimal qPCR conditions (see Supplementary Table S3). Assays used a double-quencher probe, 5’FAM/ZEN/3’IBFQ (Integrated DNA Technologies, USA), to improve delta fluorescence. Assay sequences, qPCR concentrations, and standard curve parameters are found in Supplementary Table S3. Thermal cycling conditions were:  $50^{\circ}\text{C}$  for 2 min and  $95^{\circ}\text{C}$  for 10 min followed by 40 cycles at  $95^{\circ}\text{C}$  for 15 s and  $60^{\circ}\text{C}$  for 1 min. All samples were run in triplicate on a StepOnePlus Real-Time PCR System (Life Technologies, USA). Each run had a minimum of three negative plate controls and a standard curve of tenfold dilutions ranging from  $10$  to  $1 \times 10^7$  copies/reaction.

### MinION and bioinformatics

For the MinION-based metabarcoding approach, we used universal primers (hereafter COIP, forward primer 5’-ACAAAT CAYAARGAYATYGG-3’ and reverse 5’-TTCAGGRTGN CCRAARAAYCA-3’) (Mikkelsen *et al.*, 2006), which target a 699-bp fragment of the mitochondrial cytochrome oxidase subunit I gene (COI). PCR was carried out in 50 µl reaction volumes containing 3 µl of DNA, 0.4 µl of Taq DNA polymerase (New England BioLabs, UK), 5 µl of  $10\times$  standard buffer (New England BioLabs), 5 µl of 10 mM dNTP, 0.3 µl of the forward primer (100 µM), and 0.3 µl of the reverse primer (100 µM). The PCR thermal profile was: 4 min at  $94^{\circ}\text{C}$  followed by 35 cycles of 50 s at  $94^{\circ}\text{C}$ , 40 s at  $48^{\circ}\text{C}$ , 1 min at  $68^{\circ}\text{C}$ , with a final elongation step of 7 min at  $68^{\circ}\text{C}$ . The DNA was sequenced on the MinION with the 1D Amplicon sequencing protocol (SQK-LSK108; Oxford Nanopore Technologies), except for DNA-normalized samples, which were sequenced with the 2D Amplicon sequencing protocol (SQK-LSK208; Oxford Nanopore Technologies). To extract the nucleotide sequences from the raw data generated by MinKNOW, we used Albacore 2.3.1 for base calling and de-multiplexing. The de-multiplexed fastq files were converted to fasta files using bash scripts. The resulting sequences were blasted to a database of 5220 COI sequences using blastn with an *e*-value cut-off of  $1 \times 10^{-4}$ , a minimum nucleotide identity of 50%, and a maximum number of target sequences of 2. Best blast hits (highest bit score) were selected when queries were assigned to multiple sequences. The BLAST database included 5004 full-length

sequences downloaded from NCBI, plus additional 216 sequences of Gadiformes and Anarhichadidae not already included. This ensured a robust species assignment in the presence of closely related species. Database sequences were identical to the region of COI targeted by the primers. The within-sample species composition was determined with an identity threshold of <85%. Besides the four targets, species representing <2% of sequences from a sample were categorized to “other”.

## Results

### Cross-reactivity and false positives

Throughout the study, we employed a rigorous system of controls for monitoring potential contamination, including DNA extraction blanks and at minimum triplicate PCR blanks for each qPCR run. Contamination was observed in a few negative controls (Supplementary Table S4). However, levels of contamination in negative controls were extremely low compared to qPCR results from positive samples, with a maximum of  $\leq 0.86\%$  (wolffish, in silage day 3) and overall average of  $\leq 0.0008\%$  contaminant DNA within samples (Supplementary Table S4). We assessed potential cross-amplification of non-target species using single-species samples. Minute cross-amplification was observed when using high-template concentrations, but the target species always amplified over four orders of magnitude more than non-target species (Supplementary Tables S4 and S5), and non-target samples always amplified below the limit of quantification (<10 copies/reaction; Supplementary Table S3). False-positive species were detected with the MinION (Supplementary Table S6). Across all samples, the cumulative read counts assigned to false-positive species was on average 1.39%, with the highest single-species average of 0.75% of the reads. One pure haddock sample, HExt1a (see Supplementary Table S1), showed an unexpectedly high contribution of cod reads (9.3%). This was likely caused by insufficient cleaning of the MINION flow cell since it had previously been used for a pure cod analysis (CExt1a), and inference on cod was therefore omitted for this sample. With the exclusion of this sample, the cumulative read counts assigned to false-positive species was on average 1.05%, with the largest single species average of 0.38% of the reads.

### Basic inferences of the link between DNA abundance and tissue weight

Average DNA concentrations in tissue were in the same range ( $10^7$  copies/mg), with only one individual, H3, showing a slightly lower concentration (see Supplementary Table S1 and Figure S1). Still, it is apparent that cod and whiting generally had slightly larger average mtDNA copies/mg tissue than wolffish and haddock (Supplementary Figure S1). Cod also had the highest ng DNA/mg tissue ratio, whereas whiting, haddock, and wolffish had more similar ng DNA/mg tissue ratios (Supplementary Figure S1). For the copies/ng DNA, we found average concentrations in the order  $10^4$  copies  $\text{ng}^{-1}$  DNA across all species (Supplementary Figure S1). The greatest variation within species was found for cod, having both the largest number of ( $2.3 \times 10^4$ ) copies/ng DNA and the smallest number of ( $1.4 \times 10^4$ ) copies/ng DNA estimated across individuals. Individual C2 showed the smallest individual ratio of copies/ng DNA (see Supplementary Table S1 and Figure S1), despite having relatively large number of copies/mg tissue, potentially illustrating DNA degradation.

### qPCR analysis of control samples

Single-species control samples provided 100% target species proportions (Supplementary Table S7). Still, a few copies of non-target species were found, averaging 0.0076% (max = 0.03%; min = 0). The mixed-species tissue samples, controlled for weight of starting tissue, showed modest power for DNA-based estimation of initial tissue proportions (Figure 1a–d and Supplementary Tables S7 and S8). Normalized mixed-species tissue samples (hereafter mixed-tissue samples) showed overall deviation from the expected proportions of  $12 \pm 15\%$  (cod, C),  $-17 \pm 8\%$  (haddock, H), and  $5 \pm 16\%$  (whiting, W). The systematic errors, i.e. percentage deviation from the expected proportion, were estimated to  $49 \pm 67$ ,  $-54 \pm 23$ , and  $12 \pm 49\%$  for C, H, and W, respectively. In contrast, qPCR results for normalized mixed-species DNA samples, with controlled input DNA concentration (hereafter mixed-DNA samples), showed better correspondence with DNA input proportions, as seen from the lower level of deviation,  $9 \pm 13$ ,  $-6 \pm 5$ , and  $-3 \pm 10\%$ , and systematic error,  $28 \pm 55$ ,  $-11 \pm 13$ , and  $-8 \pm 26\%$ , for C, H, and W, respectively. For all samples, qPCR had an average accuracy of  $11 \pm 15$ ,  $-14 \pm 9$ , and  $3 \pm 14\%$  for C, H, and W, respectively. These results suggest that haddock mtDNA copies were underrepresented, in particular for the mixed-tissue samples, as seen in samples CHW1, CHW2, and CHW3. However, samples CHW299 and CHW929 were exceptions with less underrepresentation and deviation (average  $-5$  and  $-7\%$ , respectively). Variation among replicate samples was on average  $11 \pm 5\%$  for the mixed-tissue samples.

### qPCR analysis of silage and fish block

Tissue from fish in the acid solution dissolved and liquefied quickly after submergence. From day 2, it was estimated that >80% of tissue was dissolved beyond visual recognition. Still, DNA from all four species was readily detected even after 21 days at room temperature. Comparison of DNA-based qPCR to expected proportions from tissue in the silage showed initial average systematic errors of  $-74 \pm 10$ ,  $-68 \pm 9$ ,  $-44 \pm 23$ , and  $279 \pm 34\%$  for C, H, W, and wolffish, respectively, with average deviations of  $37 \pm 5$ ,  $-17 \pm 2$ ,  $-2 \pm 1$ , and  $56 \pm 7\%$  (Figure 2a and Supplementary Table S9). The primary reason for those deviations was considerable overrepresentation of DNA copies from wolffish. Therefore, we also compared silage tissue and DNA composition excluding information for wolffish, which considerably lowered the systematic errors for the gadoids ( $-13 \pm 16$ ,  $9 \pm 32$ , and  $83 \pm 47\%$  for C, H, and W, respectively) and significantly increased accuracy ( $-8 \pm 10$ ,  $3 \pm 10$ , and  $6 \pm 3\%$ ) for the qPCR methodology (Figure 2b and Supplementary Table S10).

Furthermore, it was generally evident that DNA copy concentration increased on days 7, 14, and 21, where silage stirring had not been conducted in prior days (Supplementary Figure S2). The days without stirring likely caused the tissue to become more porous and hence releasing more DNA when stirring occurred, in contrast to days where it was stirred the day before. However, this did not obscure the proportional DNA estimates among species (Figure 2). Surprisingly, the highest copy concentrations for whiting and cod were found on day 21.

The qPCR method consistently detected both species in the fish blocks for all RO and swab samples. As for the silage analysis, wolffish DNA copies were significantly overrepresented (except for sample SW3) with an average deviation of  $20 \pm 1$  and

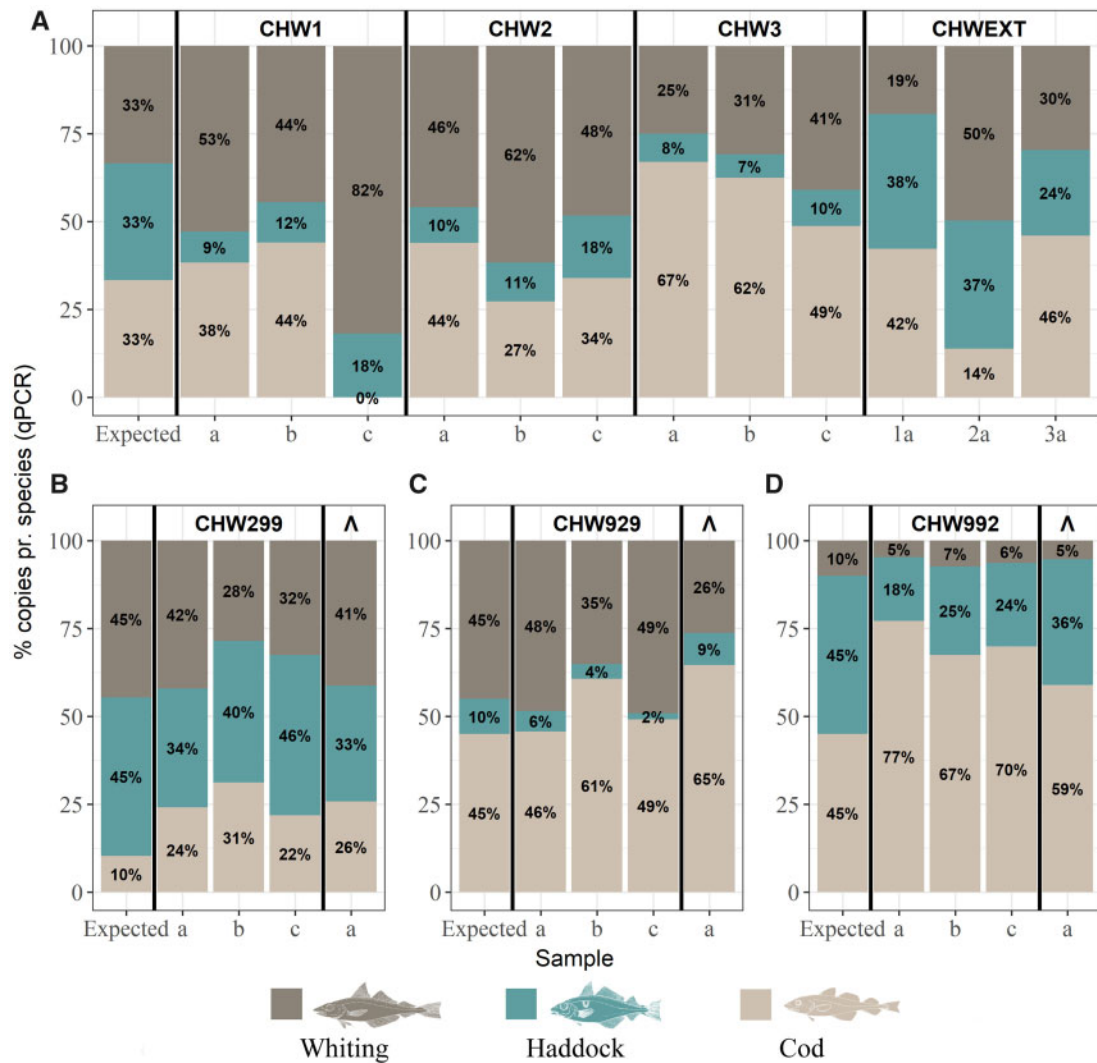

**Figure 1.** Comparison of tissue input weight percentages (expected) with qPCR-estimated DNA proportions for control samples. Tissue and DNA mixture percentages for cod, haddock, whiting, and wolffish are 33:33:33:0 (a), 10:45:45:0 (b), 45:10:45:0 (c), and 45:45:10:0 (d). Tissue mixed samples are denoted as CHW1, CHW2, CHW3, CHW299, CHW929, and CHW992. In (a) analysis of DNA-normalized samples are shown as CHWEXT and in (b)–(d) denoted as  $\Lambda$ . See text and [Supplementary Table S1](#) for explanation.

23 ± 27% in RO and swab samples, respectively ([Figure 3a](#) and [Supplementary Table S11](#)). Systematic errors were estimated to be  $-25 \pm 1$  and  $-28 \pm 32\%$  for cod and 119 ± 5 and 136 ± 158% for wolffish in RO and swab samples, respectively. There was little variation ( $SD \pm 1$ ) between estimates from the RO samples, illustrating their homogeneity. As expected, the swab method showed higher variation ( $SD \pm 27$ ), as the samples originated from different non-replicated swabbing patterns.

### Metabarcoding of samples with MinION

Selected samples were analysed with the metabarcoding approach on the MinION ([Supplementary Table S1](#)). Single-species samples (see Cross-reactivity and false positives) showed close to 100% correct read assignment to species. The highest proportion of reads assigned to other species was 0.42%, likely due to random sequencing errors ([Jain et al., 2016](#); [Quick et al., 2016](#)). The mixed-tissue samples showed deviations from input proportions of  $-8 \pm 12$ ,  $-13 \pm 10$ , and  $21 \pm 17\%$  with systematic errors

averaging  $-17 \pm 42$ ,  $-31 \pm 35$ , and  $93 \pm 59\%$  for C, H, and W, respectively ([Figure 4a](#)). Similar to the qPCR analysis, the MinION also showed improved accuracy,  $0 \pm 3$ ,  $7 \pm 14$ , and  $-7 \pm 12\%$ , and lower systematic error,  $9 \pm 24$ ,  $72 \pm 121$ , and  $-18 \pm 26\%$ , for C, H, and W respectively, when analysing mixed-DNA samples ([Figure 4b](#)). All target species were detected in all mixed samples and represented by a considerable proportion of reads (>2%). Averaging across all mixed control samples, the MinION metabarcoding approach showed deviations of  $-3 \pm 10$ ,  $-4 \pm 14$ , and  $7 \pm 18\%$  for C, H, and W, respectively ([Figure 4](#) and [Supplementary Table S12](#)).

Silage samples (days 2 and 21) analysed on the MinION showed overrepresentation of wolffish DNA reads, similar to the qPCR copy number analysis ([Supplementary Figure S3](#) and [Table S13](#)). The day 2 sample was analysed on both MinION-1 and MinION-2, revealing quantitatively different results from the same sample. For MinION-2 analysis, all gadoids were equally underrepresented, while only haddock and whiting were

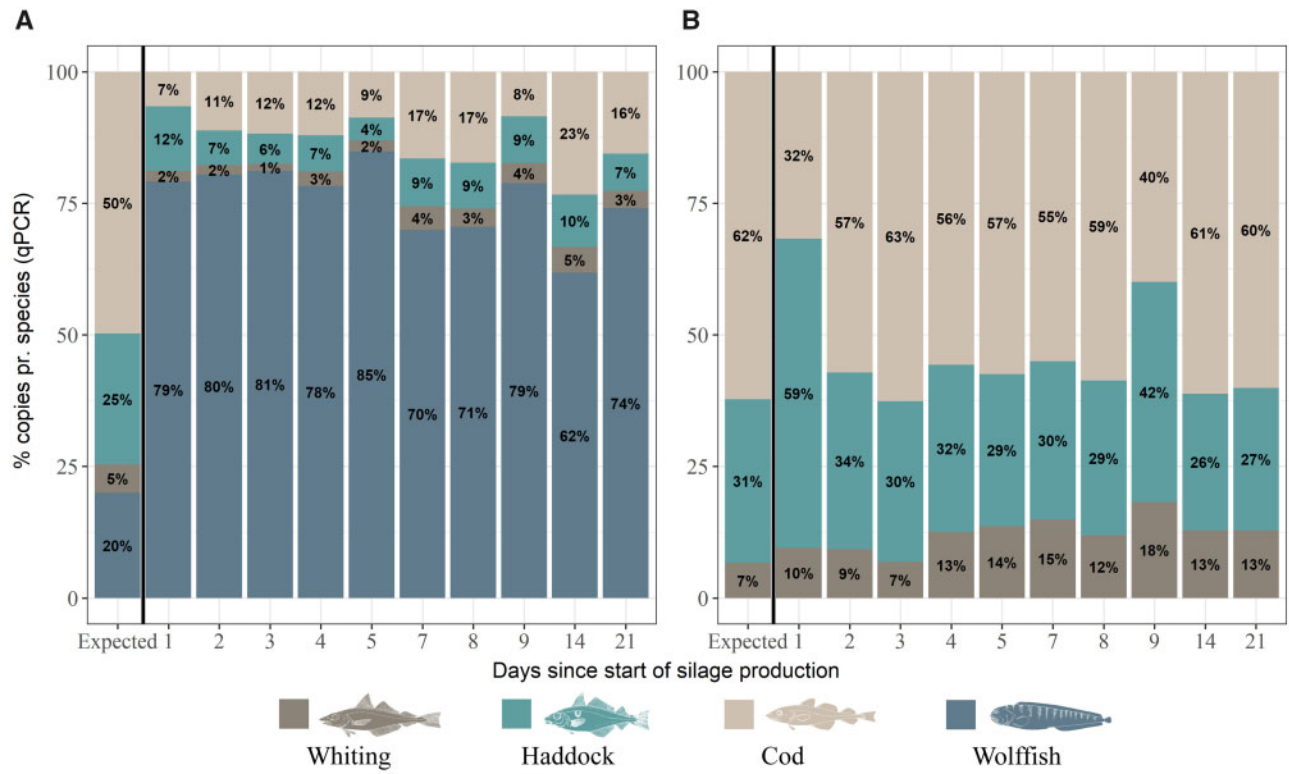

**Figure 2.** Comparison of tissue input weight percentages (expected) with qPCR-estimated DNA proportions for fish silage. Image (a) shows results for all four species, while image (b) only includes analysis of gadoids (cod, haddock, and whiting). Numbers on x-axis show day of sampling.

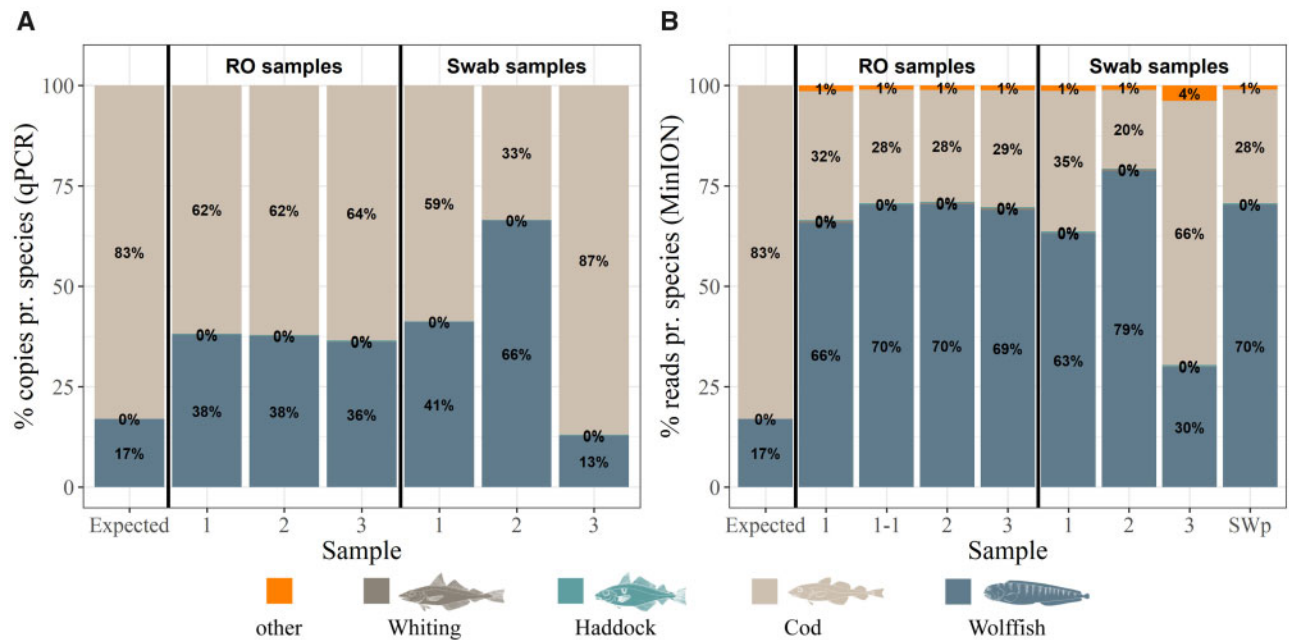

**Figure 3.** Input tissue weight percentages (expected) and estimated DNA proportions for fish block samples collected through RO and external surface swabs (swab). (a) qPCR estimates and (b) MinION metabarcoding estimates. In (b) sample 1-1 refers to the analysis of sample replicate 1 on MinION-1.

underrepresented for MinION-1. Altogether, MinION-2 metabarcoding provided proportion estimates similar to those of qPCR with a relatively lower inaccuracy,  $-10$ ,  $13$ , and  $-3\%$ , and systematic error,  $-16$ ,  $41$ , and  $-47\%$ , for C, H, and W, respectively.

Wolffish was also overrepresented in run-off and swab samples with an average deviation of  $52 \pm 2$  and  $43 \pm 19\%$  and a systematic error of  $305 \pm 11$  and  $-27 \pm 22\%$  for RO and swab samples, respectively (Figure 3b and Supplementary Table S14). Consequently, cod was underestimated with deviations  $-54 \pm 2$  and  $-46 \pm 17\%$  and systematic errors  $-65 \pm 2$  and  $119 \pm 102\%$  for RO and swab samples, respectively. Similar to qPCR, the MinION metabarcoding also showed low sample variance ( $SD \pm 2$ ) in the analysis of the replicated RO samples.

## Discussion

The present study demonstrates that DNA is a powerful tool for detecting and quantifying species contributions in mixed-fish samples, which can supplement, or even replace, visual inspection for MCS. DNA-based methods are versatile and robust allowing quick and easy sample collection and analysis for a broad range of samples and species. The successful demonstration of HTS using the ONT MinION suggests that such platforms can yield equivalent semi-quantitative results to those generated using traditional qPCR approaches, raising the possibility of developing diagnostic, laboratory-free testing of fish discard products. However, the results also revealed significant species-specific quantification bias and further development would be needed before routine implementation of DNA methods for particular fisheries and products.

Relative quantification is a tug-of-war between DNA contributions among species. Hence, for relative quantification to be directly applicable, all individuals and species should contain similar numbers of DNA copies per weight of tissue. However, we found that control tissue samples showed relatively weak relationships between tissue weight and DNA copies available for both qPCR and MinION metabarcoding. Accordingly, for the

single tissue type investigated (fin tissue), the relationship varied substantially among individuals and species. This variation may reflect natural variations in tissue mtDNA content among species and individuals but could also reflect multiple technical factors, such as different DNA extraction and qPCR/metabarcoding efficiencies, as well as sample variation and degradation. The many potential sources of variance are highlighted by the finding of more accurate and precise estimates of contributions to mixed samples from mixing DNA than from mixing tissues by weight, for both qPCR and MinION. The improved accuracy from mixed-DNA species samples suggests that the ratio between mtDNA and nuclear DNA (nDNA) is relatively stable in the samples analysed, while variation in the DNA content (mtDNA) among even relatively homogenous tissue samples is a potentially important source of intraspecific and interspecific variation. We found DNA copies of wolffish to be considerably overrepresented in silage and fish block samples for both qPCR and MinION metabarcoding, while the wolffish control samples derived from fin tissue had the lowest estimated number copies/mg of tissue. Thus, there was no straightforward link between tissue DNA content and DNA results in mixed samples. Other studies have found fivefold to tenfold variation in DNA content between tissue types (Hartmann *et al.*, 2011; Cole, 2016), suggesting that other tissue types, or more likely, proportions of different tissue types among species, can explain the disproportional number/weight of mtDNA copies in wolffish compared to gadoids. We speculate that wolffish in general slough of more DNA-containing mucous or contain more “active” tissue with higher respiratory needs, e.g. a higher skin to muscle ratio and thick skin, explaining the elevated mtDNA copy number per unit weight of whole fish. Another important factor potentially explaining the elevated mtDNA copy number could be the body shape of the wolffish, which is different from the codfishes. Noticeably, DNA copies/reads among the gadoids varied much less and were more proportional to tissue input, especially in the silage samples. This may suggest that closely related and morphologically similar

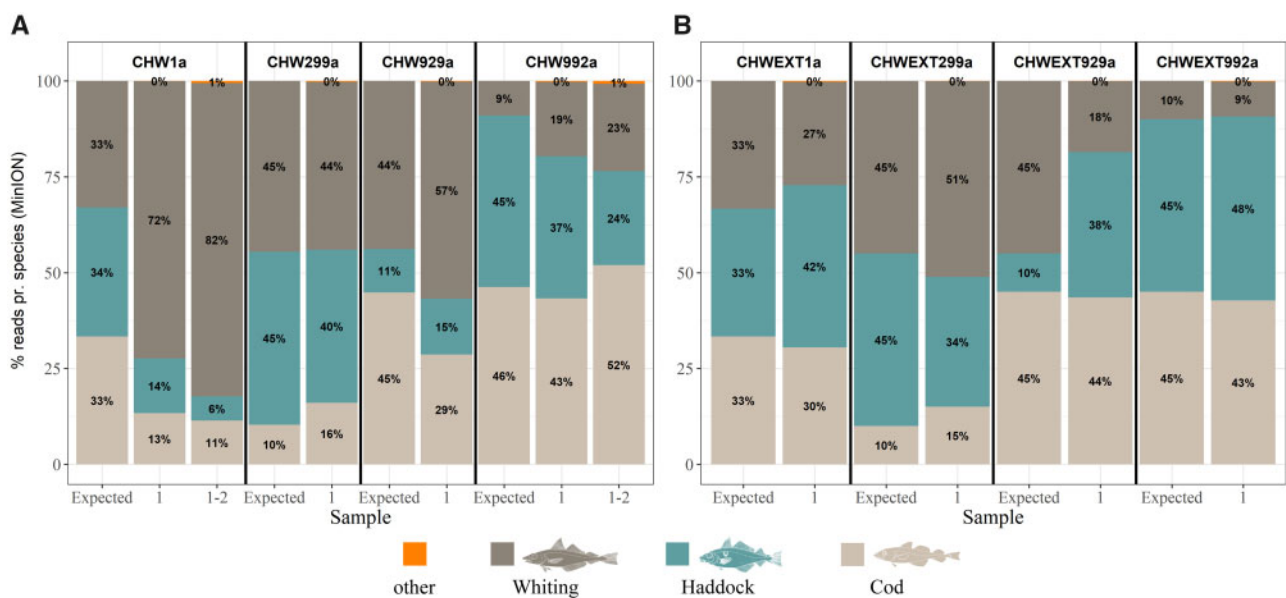

**Figure 4.** Comparison of tissue (a) and DNA (b) input percentages (expected) with DNA proportions (reads) estimated with MinION-based metabarcoding. All samples were analysed on MinION-1 (1), while some samples were analysed on both MinION-1 and MinION-2 (1–2).

species also contain more similar mtDNA copies per weight tissue than unrelated species. Other studies of sister-species generally demonstrate proportional estimates for relative quantification (Lopez and Pardo, 2005; Bojolly *et al.*, 2017), whereas disproportional relationships are seen in mixtures with more distantly related species (Thomas *et al.*, 2014; Floren *et al.*, 2015); thus, unrelated species rarely contain the same amount of mtDNA per weight tissue (Hartmann *et al.*, 2011; Floren *et al.*, 2015; Cole, 2016), corroborating our observations of interspecific variance. A potential way to minimize this difference is by targeting nDNA, instead of mtDNA, as each cell only contains one nDNA copy but can contain many and variable numbers of mtDNA copies (Cole, 2016). Still, cell number per tissue weight may vary considerably (Kozłowski *et al.*, 2010). A more robust approach to this challenge would be to implement assay-specific correction factors, as has previously been successfully applied to minimize biasing factors (Thomas *et al.*, 2016; Vasselon *et al.*, 2018). Noticeably, a correction factor can account for all biases in concert, regardless of biological or technical origin. For the silage analysis, wolffish contributions appear approximately four times higher than expected, suggesting a specific correction factor of  $\sim 0.25$ . Further studies are warranted to determine the local and global robustness of correction factors; our analysis suggests that appropriate correction factors would need to be calculated across specific analysis types and different species.

Despite reservations regarding estimation of tissue proportions from DNA suggested by the mixed-tissue control samples, silage results for gadoids were encouraging, with high precision for determining relative proportions of starting tissue weight used in silage sample production. We hypothesize that the lower precision for mixed-tissue samples may be due to fin tissue heterogeneity and higher sampling stochasticity in weighing  $<10$  mg of fish fin tissue precisely. For the silage, the dissolved fish contributed to a homogeneous DNA pool, which provides a more robust integrated DNA signal for the entire pool of specimens and tissue types in the sample. Thus, we expect well-mixed commercial scale silage production to be more robust against perturbations in DNA/tissue ratios than smaller mixtures. Similarly, the run-off samples provide an integrated signal of all fish from the frozen block, which have been in contact with the water, thereby likely providing a better representation of the full content than the swab samples. Still, if the content of the fish block is heterogeneous, e.g. with different species compositions in centre and on surface, both run-off and swab samples are likely to provide only a crude assessment of species content. On the other hand, these methods may prove highly valuable as they are much faster and non-invasive in relation to spoiling the content, in contrast to visual inspection, where fish blocks are thawed, fish identified, and weighed for MCS purposes.

The MinION and qPCR analyses provided highly similar results for both qualitative and quantitative analyses of the control samples. The main difference was the additional occurrence of false-positive species (other), associated with high read abundance (Supplementary Table S6). The MinION uses third-generation sequencing technology, which besides several positive aspects, also currently has a relatively high error rate ( $\sim 10$ – $20\%$ ) (Quick *et al.*, 2016), although the technology is quickly improving. Thus, by chance several sequences may show higher affinity to species not present in the sample. In particular, higher throughput increases the risks of random low frequency sequencing error events to occur (Jain *et al.*, 2016; Quick *et al.*, 2016),

and coupled with a relatively low-identity threshold (85%), the nanopore sequencing will generate false-positive species identification. However, true- and false-positive proportions are expected to be stable regardless of throughput; thus, false positives will remain at a very low rate. Given these results, it would be interesting for future studies to compare the MinION with more accurate sequencing technologies to provide a better evaluation of MinION performance. However, in this study, it was a necessity to have long reads (699 bp) to ensure correct taxonomic assignment of closely related species (codfishes), which hampered direct comparison to other sequencing technologies due to read length restrictions.

For species detection in control and fish block samples, sequencing error rates did not seem to be problematic, as long as positive species detection was set at a 2% minimum threshold of cumulated reads. In contrast, the MinION analysis showed less accurate estimates of biomass proportions and less reliable detection of whiting (i.e. whiting occasionally represented  $<2\%$  of the cumulated reads despite representing 5% of the total biomass). We suspect that the difference between the two analytical approaches is due to differences in targeted DNA fragment sizes. qPCR mtDNA fragments were between 72 and 129 bp whereas MinION-based metabarcoding targeted a 699-bp fragment. Longer DNA fragments are in general rare in processed material, such as silage, and the analysis will be more stochastic when only a few long molecules ( $>200$  bp) remain (Deiner *et al.*, 2017; Jo *et al.*, 2017; Piskata *et al.*, 2017). Smaller fragments, so-called “mini barcodes” would likely improve detection power, but there is a trade-off between minimizing amplicon length and taxonomic resolution (Shokralla *et al.*, 2015; Thomsen *et al.*, 2016). Clear taxonomic sequence distinction provided by long DNA barcodes is still vital for MinION-based species assignment due to the system’s high sequencing error rate and relative poor sequence performance with short target amplicons. Future application of “direct sequencing” that is independent of an initial taxon-specific PCR represents an appealing approach for avoiding both the targeted sequence analysis and amplification biases (Thomas *et al.*, 2016; Stat *et al.*, 2017; Fonseca, 2018). This approach can also be combined with MinION analysis known as “selective sequencing” where only predefined target sequences are processed (Loose *et al.*, 2016).

The general issues of contamination and sensitivity are important to address before implementing the techniques for fisheries MCS. Catching, handling, and processing related to commercial fishing practices are far from sterile procedures with many possibilities for both natural and “technical” contamination. For example, many commercial fish species are predators, potentially with stomach contents including other MCS target species. Likewise, all exterior fish surfaces have potentially been in contact with other species likely leaving false-positive DNA traces. However, low-level contamination in the samples utilized here did not generally approach the normal limits of detection or quantification in the assays and we expect that fish present in the silage and fish blocks to swamp-out any trace contaminant species.

In conclusion, this study yielded very encouraging results for the use of DNA-based product analysis to estimate the initial relative biomass of different fish species in processed discard products. It represents a “proof of concept” rather than an exhaustive evaluation of all parameters of importance for robust species quantification relevant to all fisheries and products. This also



includes the number of samples and analytical replicates, which may have reduced the deviations/errors. Any future practical application would require significant refinement and calibration to be conducted, and methods would need to be further explored and optimized to fully characterize the sensitivity, specificity, and robustness of diagnostic tests. However, the platforms for DNA analysis assessed here potentially form the basis of robust, standardized, and cost-effective methods to verify the species composition of complex bulk fish products, which would be of significant interest to the industry and fisheries managers, whereas visual identification and quantification is not possible.

### Data availability statement

Demultiplexed MinION sequences have been deposited to the European Nucleotide Archive (<https://www.ebi.ac.uk/ena>) under study accession PRJEB39300.

### Supplementary data

Supplementary material is available at the *ICESJMS* online version of the manuscript.

### Acknowledgements

We are grateful to the following people for assistance and support for the laboratory experiments: Maj-Britt Jacobsen, Britta Sønderkov Pedersen, Dorte Meldrup, Henrik Baktoft, Lars Magnus Wulf Jacobsen, and Clara Ulrich from DTU Aqua and Steinunn Á. Magnúsdóttir, Ágústa K. Sigfúsdóttir, and Kristinn Olafsson from Mátis. We would also like to acknowledge Simon Dures for carrying out library preparation and MinION sequencing. We also want to extend our gratitude to two anonymous reviewers whose comments improved the article.

### Funding

This work has been funded by the European Union's Horizon 2020 research and innovation programme under grant no. 633680 (DiscardLess).

### References

- Batsleer, J., Hamon, K. G., van Overzee, H. M. J., Rijnsdorp, A. D., and Poos, J. J. 2015. High-grading and over-quota discarding in mixed fisheries. *Reviews in Fish Biology and Fisheries*, 25: 715–736.
- Bojolly, D., Doyen, P., Le Fur, B., Christaki, U., Verrez-Bagnis, V., Grard, T., Périne, P., *et al.* 2017. Development of a qPCR method for the identification and quantification of two closely related tuna species, Bigeye tuna (*Thunnus obesus*) and Yellowfin tuna (*Thunnus albacares*), in canned tuna. *Journal of Agricultural and Food Chemistry*, 65: 913–920.
- Cole, L. W. 2016. The evolution of per-cell organelle number. *Frontiers in Cell and Developmental Biology*, 4: 85.
- Deiner, K., Renshaw, M. A., Li, Y., Olds, B. P., Lodge, D. M., and Pfrender, M. E. 2017. Long-range PCR allows sequencing of mitochondrial genomes from environmental DNA. *Methods in Ecology and Evolution*, 8: 1888–1898.
- European Commission. 2013. Regulation (EU) No 1380/2013 of the European Parliament and of the Council of 11 December 2013. *Official Journal of the European Union*. <https://eur-lex.europa.eu/legal-content/EN/TXT/?uri=CELEX%3A32013R1380>.
- Floren, C., Wiedemann, I., Brenig, B., Schütz, E., and Beck, J. 2015. Species identification and quantification in meat and meat products using droplet digital PCR (ddPCR). *Food Chemistry*, 173: 1054–1058.
- Fonseca, V. G. 2018. Pitfalls in relative abundance estimation using eDNA metabarcoding. *Molecular Ecology Resources*, 18: 923–926.
- Grant, S. M., and Hiscock, W. 2014. Post-capture survival of Atlantic wolffish (*Anarhichas lupus*) captured by bottom otter trawl: can live release programs contribute to the recovery of species at risk? *Fisheries Research*, 151: 169–176.
- Guillen, J., Holmes, S. J., Carvalho, N., Casey, J., Dörner, H., Gibin, M., Mannini, A., *et al.* 2018. A review of the European Union landing obligation focusing on its implications for fisheries and the environment. *Sustainability*, 10: 900.
- Hartmann, N., Reichwald, K., Wittig, I., Dröse, S., Schmeisser, S., Lück, C., Hahn, C., *et al.* 2011. Mitochondrial DNA copy number and function decrease with age in the short-lived fish *Nothobranchius furzeri*. *Aging Cell*, 10: 824–831.
- Heath, M. R., Cook, R. M., Cameron, A. I., Morris, D. J., and Speirs, D. C. 2014. Cascading ecological effects of eliminating fishery discards. *Nature Communications*, 5: 1–8.
- Jain, M., Olsen, H. E., Paten, B., and Akeson, M. 2016. The Oxford Nanopore MinION: delivery of nanopore sequencing to the genomics community. *Genome Biology*, 17: 239.
- Jo, T., Murakami, H., Masuda, R., Sakata, M. K., Yamamoto, S., and Minamoto, T. 2017. Rapid degradation of longer DNA fragments enables the improved estimation of distribution and biomass using environmental DNA. *Molecular Ecology Resources*, 17: e25–e33.
- Kearse, M., Moir, R., Wilson, A., Stones-Havas, S., Cheung, M., Sturrock, S., Buxton, S., *et al.* 2012. Geneious basic: an integrated and extendable desktop software platform for the organization and analysis of sequence data. *Bioinformatics*, 28: 1647–1649.
- Knudsen, S. W., Ebert, R. B., Hesselsoe, M., Kuntke, F., Hassingboe, J., Mortensen, P. B., Thomsen, P. F., *et al.* 2019. Species-specific detection and quantification of environmental DNA from marine fishes in the Baltic Sea. *Journal of Experimental Marine Biology and Ecology*, 510: 31–45.
- Kozłowski, J., Czarnoński, M., François-Krassowska, A., Maciak, S., and Pis, T. 2010. Cell size is positively correlated between different tissues in passerine birds and amphibians, but not necessarily in mammals. *Biology Letters*, 6: 792–796.
- Larsen E. P. Dalskov J. Nielsen E. E. Kirkegaard E. Nielsen J. W. N. Tørring P. and Schou M. 2013. Dansk fiskeris udnyttelse af discardforbuddet. DTU rapport. [https://backend.orbit.dtu.dk/ws/portalfiles/portal/89362233/275\\_2013\\_Dansk\\_fiskeris\\_udnyttelse\\_af\\_discardforbuddet\\_1\\_.pdf](https://backend.orbit.dtu.dk/ws/portalfiles/portal/89362233/275_2013_Dansk_fiskeris_udnyttelse_af_discardforbuddet_1_.pdf).
- Loose, M., Malla, S., and Stout, M. 2016. Real-time selective sequencing using nanopore technology. *Nature Methods*, 13: 751–754.
- Lopez, I., and Pardo, M. A. 2005. Application of relative quantification TaqMan real-time polymerase chain reaction technology for the identification and quantification of *Thunnus alalunga* and *Thunnus albacares*. *Journal of Agricultural and Food Chemistry*, 53: 4554–4560.
- Menegon, M., Cantaloni, C., Rodriguez-Prieto, A., Centomo, C., Abdelfattah, A., Rossato, M., Bernardi, M., *et al.* 2017. On site DNA barcoding by nanopore sequencing. *PLoS One*, 12: e0184741.
- Mikheyev, A. S., and Tin, M. M. Y. 2014. A first look at the Oxford Nanopore MinION sequencer. *Molecular Ecology Resources*, 14: 1097–1102.
- Mikkelsen, P. M., Bieler, R., Kappner, I., and Rawlings, T. A. 2006. Phylogeny of Veneroidea (Mollusca: Bivalvia) based on morphology and molecules. *Zoological Journal of the Linnean Society*, 148: 439–521.
- Miya, M., Sato, Y., Fukunaga, T., Sado, T., Poulsen, J. Y., Sato, K., Minamoto, T., *et al.* 2015. MiFish, a set of universal PCR primers for metabarcoding environmental DNA from fishes: detection of more than 230 subtropical marine species. *Royal Society Open Science*, 2: 150088.

- Nagase, M., Yi, R., Hidaka, F., Maeta, K., Aimi, T., Yamaguchi, T., Suginaka, K., *et al.* 2010. Quantification of relative flying fish paste content in the processed seafood ago-noyaki using real-time PCR. *Fisheries Science*, 76: 885–892.
- Piskata, Z., Pospisilova, E., and Borilova, G. 2017. Comparative study of DNA extraction methods from fresh and processed Yellowfin tuna muscle tissue. *International Journal of Food Properties*, 20: S430–S443.
- Quick, J., Loman, N. J., Duraffour, S., Simpson, J. T., Severi, E., Cowley, L., Bore, J. A., *et al.* 2016. Real-time, portable genome sequencing for Ebola surveillance. *Nature*, 530: 228–232.
- Sánchez, A., Quinteiro, J., Vázquez, J. A., Perez-Martín, R. I., and Sotelo, C. G. 2019. Comparison of real-time PCR methods for quantification of European hake (*Merluccius merluccius*) in processed food samples. *Food Chemistry*, 272: 279–285.
- Shokralla, S., Hellberg, R. S., Handy, S. M., King, I., and Hajibabaei, M. 2015. A DNA mini-barcoding system for authentication of processed fish products. *Scientific Reports*, 5: 15894.
- Spens, J., Evans, A. R., Halfmaerten, D., Knudsen, S. W., Sengupta, M. E., Mak, S. S. T., Sigsgaard, E. E., *et al.* 2017. Comparison of capture and storage methods for aqueous microbial eDNA using an optimized extraction protocol: advantage of enclosed filter. *Methods in Ecology and Evolution*, 8: 635–645.
- Srivathsan, A., Baloglu, B., Wang, W., Tan, W. X., Bertrand, D., Ng, A. H. Q., Boey, E. J. H., *et al.* 2018. A MinION™-based pipeline for fast and cost-effective DNA barcoding. *Molecular Ecology Resources*, 18: 1035–1049.
- Stat, M., Huggett, M. J., Bernasconi, R., DiBattista, J. D., Berry, T. E., Newman, S. J., Harvey, E. S., *et al.* 2017. Ecosystem biomonitoring with eDNA: metabarcoding across the tree of life in a tropical marine environment. *Scientific Reports*, 7: 12240.
- Tanabe, S., Hase, M., Yano, T., Sato, M., Fujimura, T., and Akiyama, H. 2007. A real-time quantitative PCR detection method for pork, chicken, beef, mutton, and horseflesh in foods. *Bioscience, Biotechnology, and Biochemistry*, 71: 3131–3135.
- Thomas, A. C., Deagle, B. E., Eveson, J. P., Harsch, C. H., and Trites, A. W. 2016. Quantitative DNA metabarcoding: improved estimates of species proportional biomass using correction factors derived from control material. *Molecular Ecology Resources*, 16: 714–726.
- Thomas, A. C., Jarman, S. N., Haman, K. H., Trites, A. W., and Deagle, B. E. 2014. Improving accuracy of DNA diet estimates using food tissue control materials and an evaluation of proxies for digestion bias. *Molecular Ecology*, 23: 3706–3718.
- Thomsen, P. F., Møller, P. R., Sigsgaard, E. E., Knudsen, S. W., Jørgensen, O. A., and Willerslev, E. 2016. Environmental DNA from seawater samples correlate with trawl catches of subarctic, deepwater fishes. *PLoS One*, 11: e0165252.
- Ushio, M., Murakami, H., Masuda, R., Sado, T., Miya, M., Sakurai, S., Yamanaka, H., *et al.* 2018. Quantitative monitoring of multi-species fish environmental DNA using high-throughput sequencing. *Metabarcoding and Metagenomics*, 2: e23297.
- Vasselon, V., Bouchez, A., Rimet, F., Jacquet, S., Trobajo, R., Corniquel, M., Tapolczai, K., *et al.* 2018. Avoiding quantification bias in metabarcoding: application of a cell biovolume correction factor in diatom molecular biomonitoring. *Methods in Ecology and Evolution*, 9: 1060–1069.
- Wen, J., Zeng, L., Sun, Y., Chen, D., Xu, Y., Luo, P., Zhao, Z., *et al.* 2015. Authentication and traceability of fish maw products from the market using DNA sequencing. *Food Control*, 55: 185–189.

*Handling editor: W. Stewart Grant*
